# Supplementary material for: Increased mitochondrial protein import and cardiolipin remodelling upon early mtUPR
Source: PubMed Central journal article supplement (PMC8282050; doi:10.1371/journal.pgen.1009664), 2021-07-02

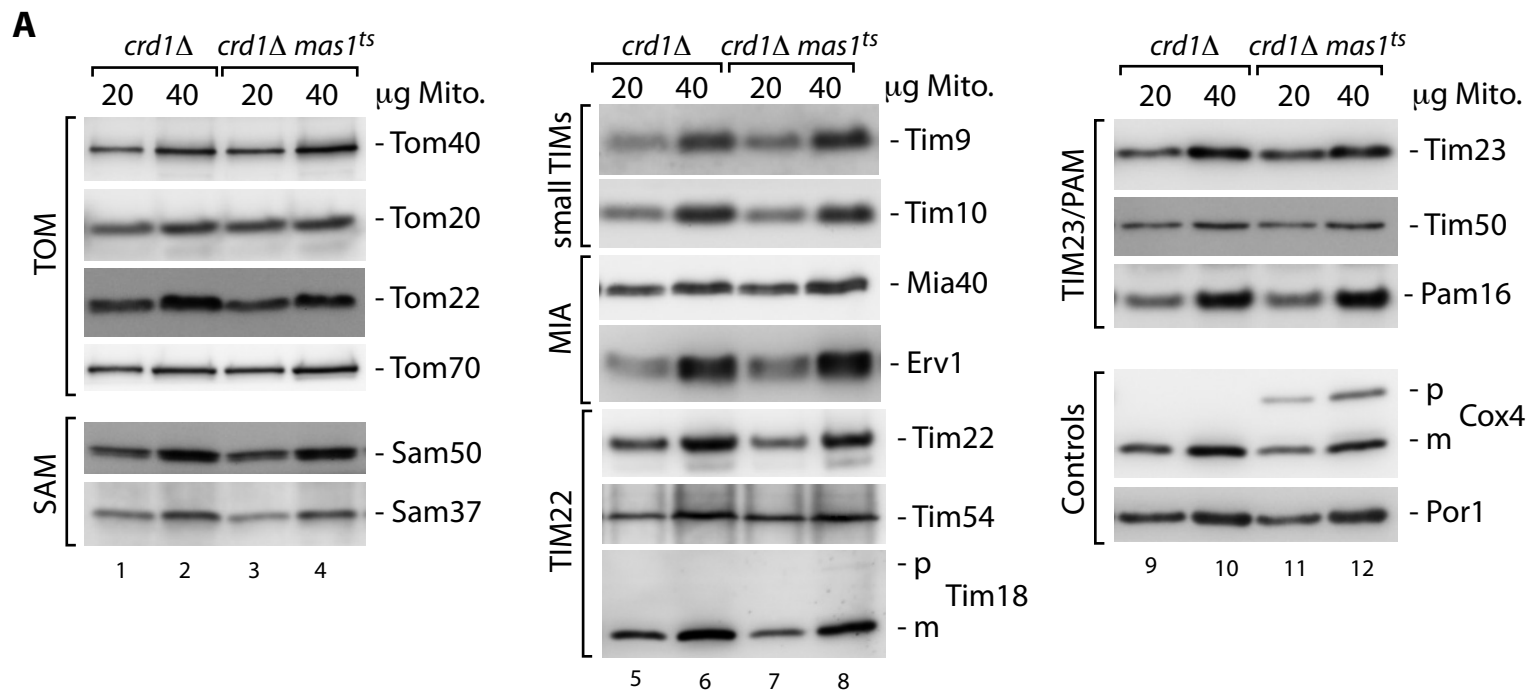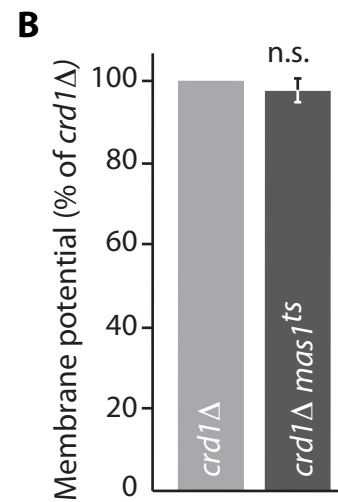

Supplement: pgen.1009664.s009.pdf [file pgen.1009664.s009.pdf]
