# Supplementary material for: Increased mitochondrial protein import and cardiolipin remodelling upon early mtUPR
Source: PubMed Central journal article supplement (PMC8282050; doi:10.1371/journal.pgen.1009664), 2021-07-02
Supplement: pgen.1009664.s010.pdf [file pgen.1009664.s010.pdf]

**S1 Table.** List of yeast strains used in this study.

| Name                                             | Genotype                                                                                              | Reference  |
|--------------------------------------------------|-------------------------------------------------------------------------------------------------------|------------|
| YPH499/Wild-type                                 | YPH499 (WT) MATa, ade2-101, his3- $\Delta$ 200, leu2- $\Delta$ 1, ura3-52, trp1 $\Delta$ 63, lys2-801 | 47         |
| Wild-type (for <i>mas1<sup>ts</sup></i> strain)  | YPH499 <i>mas1::HIS3MX6</i><br>pFL39-MAS1                                                             | 22         |
| <i>mas1<sup>ts</sup></i>                         | YPH499 <i>mas1::HIS3MX6</i><br>pFL39- <i>mas1<sup>R144C</sup></i>                                     | 22         |
| <i>crd1<math>\Delta</math></i>                   | YPH499 <i>mas1::HIS3MX6</i><br>pFL39-MAS1 <i>crd1::natNT2</i>                                         | This paper |
| <i>crd1<math>\Delta</math> mas1<sup>ts</sup></i> | YPH499 <i>mas1::HIS3MX6</i><br>pFL39- <i>mas1<sup>R144C</sup> crd1::natNT2</i>                        | This paper |
| <i>taz1<math>\Delta</math></i>                   | YPH499 <i>mas1::HIS3MX6</i><br>pFL39-MAS1 <i>taz1::natNT2</i>                                         | This paper |
| <i>taz1<math>\Delta</math> mas1<sup>ts</sup></i> | YPH499 <i>mas1::HIS3MX6</i><br>pFL39- <i>mas1<sup>R144C</sup> taz1::natNT2</i>                        | This paper |
| <i>ale1<math>\Delta</math></i>                   | YPH499 <i>mas1::HIS3MX6</i><br>pFL39-MAS1 <i>ale1::natNT2</i>                                         | This paper |
| <i>ale1<math>\Delta</math> mas1<sup>ts</sup></i> | YPH499 <i>mas1::HIS3MX6</i><br>pFL39- <i>mas1<sup>R144C</sup> ale1::natNT2</i>                        | This paper |
| <i>are1<math>\Delta</math></i>                   | YPH499 <i>mas1::HIS3MX6</i><br>pFL39-MAS1 <i>are1::natNT2</i>                                         | This paper |
| <i>are1<math>\Delta</math> mas1<sup>ts</sup></i> | YPH499 <i>mas1::HIS3MX6</i><br>pFL39- <i>mas1<sup>R144C</sup> are1::natNT2</i>                        | This paper |
| <i>ayr1<math>\Delta</math></i>                   | YPH499 <i>mas1::HIS3MX6</i><br>pFL39-MAS1 <i>ayr1::natNT2</i>                                         | This paper |
| <i>ayr1<math>\Delta</math> mas1<sup>ts</sup></i> | YPH499 <i>mas1::HIS3MX6</i><br>pFL39- <i>mas1<sup>R144C</sup> ayr1::natNT2</i>                        | This paper |

|                                                |                                                                                        |            |
|------------------------------------------------|----------------------------------------------------------------------------------------|------------|
| <i>cho1</i> $\Delta$                           | YPH499 <i>mas1::HIS3MX6</i><br>pFL39-MAS1 <i>cho1::natNT2</i>                          | This paper |
| <i>cho1</i> $\Delta$ <i>mas1</i> <sup>ts</sup> | YPH499 <i>mas1::HIS3MX6</i><br>pFL39- <i>mas1</i> <sup>R144C</sup> <i>cho1::natNT2</i> | This paper |
| <i>lpp1</i> $\Delta$                           | YPH499 <i>mas1::HIS3MX6</i><br>pFL39-MAS1 <i>lpp1::natNT2</i>                          | This paper |
| <i>lpp1</i> $\Delta$ <i>mas1</i> <sup>ts</sup> | YPH499 <i>mas1::HIS3MX6</i><br>pFL39- <i>mas1</i> <sup>R144C</sup> <i>lpp1::natNT2</i> | This paper |
| <i>opi3</i> $\Delta$                           | YPH499 <i>mas1::HIS3MX6</i><br>pFL39-MAS1 <i>opi3::natNT2</i>                          | This paper |
| <i>opi3</i> $\Delta$ <i>mas1</i> <sup>ts</sup> | YPH499 <i>mas1::HIS3MX6</i><br>pFL39- <i>mas1</i> <sup>R144C</sup> <i>opi3::natNT2</i> | This paper |
| <i>psd1</i> $\Delta$                           | YPH499 <i>mas1::HIS3MX6</i><br>pFL39-MAS1 <i>psd1::natNT2</i>                          | This paper |
| <i>psd1</i> $\Delta$ <i>mas1</i> <sup>ts</sup> | YPH499 <i>mas1::HIS3MX6</i><br>pFL39- <i>mas1</i> <sup>R144C</sup> <i>psd1::natNT2</i> | This paper |
