# Supplementary material for: Increased mitochondrial protein import and cardiolipin remodelling upon early mtUPR
Source: PubMed Central journal article supplement (PMC8282050; doi:10.1371/journal.pgen.1009664), 2021-07-02
Supplement: pgen.1009664.s011.pdf [file pgen.1009664.s011.pdf]

**S2 Table.** Primary antibodies used in this study. All antisera were raised in rabbit.

| Antigen | Reference | Dilution                                                         |
|---------|-----------|------------------------------------------------------------------|
| Cox4    | GR578-4   | 1:2000                                                           |
| Hsp10   | GR4925-3  | 1:250                                                            |
| Por1    | GR3622-2  | 1:1000                                                           |
| Tom20   | GR3225-7  | 1:5000                                                           |
| Tom40   | 169-7     | 1:500                                                            |
| Tom70   | GR657-3   | 1:1000                                                           |
| Tom22   | GR3227-3  | 1:5000                                                           |
| Tim9    | GR2013-7  | 1:250                                                            |
| Tim10   | GR2041-7  | 1:250                                                            |
| Tim18   | GR5115-1  | 1:250                                                            |
| Tim22   | GR5113-5  | 1:250                                                            |
| Tim23   | 133-14    | 1:4000                                                           |
| Tim50   | GR5185-7  | 1:500; antiserum raised against the purified mature protein      |
| Tim54   | GR5183-7  | 1:250                                                            |
| Pam16   | GR749-5   | 1:500                                                            |
| Sam37   | GR5188-5  | 1:250; antiserum raised against the purified full-length protein |
| Sam50   | 312-15    | 1:500                                                            |
| Erv1    | GR864-2   | 1:250                                                            |
| Mia40   | B315-1    | 1:1500                                                           |
| Ups1    | GR2745-4  | 1:200                                                            |
| Pgs1    | GR1921-5  | 1:200                                                            |
